1 **Community Assessment of School-Based Mass Drug Administration Program for Soil-**

2 **Transmitted Helminths and Schistosomiasis in Nigeria.**

3

4 **Folahanmi T. Akinsolu<sup>1,2\*</sup>¶, Olunike Abodunrin<sup>1,3</sup>¶, Mobolaji Olagunju<sup>4</sup>¶, Ifeoluwa E.**

5 **Adewole<sup>1&</sup>, Nurudeen Rahman<sup>7</sup>¶, Anita Dabar<sup>1&</sup>, Diana W. Njuguna<sup>5</sup>¶, Islamiat Y.**

6 **Shoneye<sup>6&</sup>, Abideen Salako<sup>1,2\*</sup>¶, Oliver C. Ezechi<sup>1,2\*</sup>¶, Orsolya Varga<sup>8</sup>¶, Olaoluwa P.**

7 **Akinwale<sup>1,2</sup>¶**

8 **<sup>1</sup>Lead City University, Ibadan**

9 **<sup>2</sup>Nigerian Institute of Medical Research, Lagos**

10 **<sup>3</sup>Lagos State Health Management Agency, Lagos**

11 **<sup>4</sup>Nanjing Medical University, China**

12 **<sup>5</sup>Dedan Kimathi University of Technology, Kenya**

13 **<sup>6</sup>Ogun State Ministry of Health, Abeokuta**

14 **<sup>7</sup>Swiss Tropical and Public Health Institute, Switzerland**

15 **<sup>8</sup>University of Debrecen, Hungary**

16

17 **\*Corresponding author**

18 **[Folahanmi.tomiwa@gmail.com](mailto:Folahanmi.tomiwa@gmail.com)**

19

20 **¶These authors contributed equally to this work.**

21 **&These authors also contributed equally to this work.**

22 **Abstract**

23 **Background:** Neglected tropical diseases, such as soil-transmitted helminths and  
24 schistosomiasis, are prevalent in sub-Saharan Africa, particularly in Nigeria. Mass drug  
25 administration is the primary control intervention, but the coverage and utilization of these  
26 programs are often inadequate. This study aimed to investigate community perceptions of  
27 school-based mass drug administration programs for these infections in Nigeria and to identify  
28 the barriers to their utilization and coverage.

29 **Methodology/Principal Findings:** The study used a qualitative research approach, involving  
30 focus group discussions and in-depth interviews with stakeholders involved in neglected  
31 tropical disease control programs in Ogun State, Nigeria. A semi-structured questionnaire was  
32 used to guide the exploration of ideas, and the data were analyzed using the QRS Nvivo 12  
33 software package. The study found several barriers such as poor drug acceptability,  
34 accessibility, and effectiveness, low knowledge and awareness of the diseases and control  
35 interventions, inadequate community engagement and involvement, and weak health system  
36 and partner support to the utilization and coverage of control interventions for soil-transmitted  
37 helminths and schistosomiasis. The study also identified recommendations for addressing these  
38 barriers, including community sensitization and engagement, improving drug distribution and  
39 effectiveness, strengthening health system support, and enhancing partner collaboration and  
40 coordination.

41 **Conclusions/Significance:** The study revealed correct perceptions of transmission but some  
42 misconceptions about disease causation, transmission, and drug safety. Participants expressed  
43 a desire for better sensitization campaigns and more assurances of their safety. To improve  
44 mass drug administration programs, the study recommends strengthening health education  
45 messages and increasing the visibility of on-site medical personnel. The findings have  
46 implications for improving the effectiveness of these programs and reducing the burden of  
47 intestinal parasitic infections in the community. The study highlights the need for community

- 48 engagement and education, health system support, and partner collaboration to ensure the
- 49 successful implementation of mass drug administration programs.

## 50 **Author Summary**

51 This study explored the barriers to the utilization and coverage of control interventions for soil-  
52 transmitted helminths and schistosomiasis in Nigeria. Key informant interviews and focus  
53 group discussions were conducted with stakeholders involved in Neglected Tropical Disease  
54 school-based control programs, including community members, teachers, parents, and school-  
55 aged children. The study found that the main barriers to the utilization and coverage of control  
56 interventions for soil-transmitted helminths and schistosomiasis were poor drug acceptability,  
57 limited accessibility to drugs, and inadequate knowledge about the diseases and the control  
58 interventions. Additionally, the study found that the implementation of Neglected Tropical  
59 Disease control programs was inconsistent due to a lack of support from partners. Overall, our  
60 study provides important insights into the barriers to Neglected Tropical Disease school-based  
61 control programs and highlights the need for improved drug acceptability, accessibility, and  
62 knowledge about the diseases and control interventions. Our findings can inform the  
63 development of effective interventions to improve the utilization and coverage of control  
64 interventions.

## 65 Introduction

66 Soil-transmitted helminths (STH) and schistosomiasis (SCH) are among 20 neglected tropical  
67 diseases (NTDs) identified by WHO and are responsible for approximately 150,000 deaths a  
68 year (1-3). Africa accounts for 40% of the global burden of NTDs (4). In several developing  
69 countries, NTDs are major public health problems including Nigeria. Nigeria has the largest  
70 burden of NTDs in sub-Saharan Africa, accounting for 25% of the total burden in the region  
71 (2, 5). In Nigeria, STH and SCH infections harm the overall health status and fitness of school-  
72 aged children (SAC) (6). STH and SCH are poverty-related diseases, and SAC is the group at  
73 the highest risk.

74 Over the last three decades, considerable attention and funding have been given to NTDs, with  
75 most recent efforts being targeted towards the attainment of commitments detailed in the WHO  
76 Ending the neglect to attain the Sustainable Development Goal that pursues the control and  
77 elimination of selected NTDs by 2030 (7, 8). STH and SCH are primarily controlled through  
78 mass drug administration (MDA) programs delivered to SAC via school-based delivery  
79 platforms to reduce the occurrence, severity, and long-term consequences of morbidity (9).  
80 While MDA is the primary strategy for the control and elimination of STH and SCH, the  
81 treatment has been inconsistent. There are concerns regarding the ability of these intervention  
82 achievements to be maintained in the face of programmatic, social, and political changes (2,  
83 10). With the approaching year 2030, it is imperative to assess both the accomplishments and  
84 obstacles encountered in the implementation of MDA to ensure that the goal of equitable  
85 achievement of the 'end game' is attained in varied and rapidly evolving contexts.

86 A better understanding of the facilitators and barriers of integration within existing integrated  
87 programs can enhance public health integration efforts in Nigeria. The integration of NTD  
88 control programs has been identified as a highly promising approach toward achieving the  
89 London Declaration goals and has been recommended by the WHO for NTD-endemic  
90 countries to optimize program implementation (9). Since STH and SCH NTD control programs  
91 rely on MDA, it is crucial to comprehend the factors that impact the different stages of

92 implementation, such as acceptability, coverage, and compliance. Moreover, identifying and  
93 assessing the factors that influence implementation outcomes is essential to ensure the  
94 successful implementation of NTD control programs. In the past, separate MDA programs  
95 were implemented for schistosomiasis and STH control in Ogun State. However, an integrated  
96 school-based MDA program for both diseases was introduced in 2016 (11). Despite significant  
97 progress in eradicating schistosomiasis and STH, there is a need to investigate the  
98 implementation challenges that hinder the uptake, utilization, and coverage of the integrated  
99 MDA programs at the community level. Understanding the community's perceptions can  
100 provide valuable insights for program managers to improve current control strategies(12).

101 The primary aim of this study was to understand the community's perceptions of the school-  
102 based MDA control programs for STH and SCH infections and how these perceptions could  
103 impact the control and elimination of these infections. Moreover, as the primary targets of the  
104 school-based MDA control programs, the SAC themselves possess knowledge, attitudes, and  
105 practices that must be understood and corrected to help eliminate these infections. Therefore,  
106 the study also includes exploring the community's perceptions of SAC regarding the MDA  
107 control programs.

108 **Methods and materials**

109 **Ethical statement**

110 The study was conducted following the principles outlined in the Declaration of Helsinki, and  
111 all participant data was treated with strict confidentiality throughout the study. The study  
112 received ethical approval from the Institutional Review Board of the Nigerian Institute of  
113 Medical Research, Lagos, Nigeria (reference number IRB/21/004, approval date February 16,  
114 2021), and social approval from the Department of Health Planning, Research, and Statistics,  
115 Ogun State Ministry of Health, Ogun State, Nigeria (reference number HPRS/351/388,  
116 approval date June 16, 2021). Verbal informed consent was obtained from all study participants  
117 after the objective and purpose of the study were explained to them. Informed assent forms  
118 were provided to children and minors, and informed parental consent was obtained for their  
119 parents or local guardians. For illiterate participants, impartial witnesses were enlisted to assist  
120 with the consenting process. Participants were included in the study only after they had  
121 individually signed the informed consent/assent form and received a paper copy of it.

122 **Study settings**

123 Ogun State, Nigeria was selected as the study location due to its high prevalence of STH and  
124 SCH, and the inconsistent support of partner programs for NTD control. Four local government  
125 areas (LGAs) in Ogun State were purposively selected based on recommendations from the  
126 Department of Public Health, Ogun State Ministry of Health. The selected LGAs were Ikenne,  
127 Abeokuta North, Abeokuta South, and Obafemi Owode.

128 **Study Design and participants**

129 This study employed a qualitative research approach to explore barriers to the utilization and  
130 coverage of control interventions in neglected tropical disease (NTD) control programs. The  
131 study focused on stakeholders involved in NTD control programs in Ogun State, Nigeria, where  
132 STH and SCH are endemic. Purposive sampling was used to select key informants and focus  
133 group participants based on their engagement in various positions in the health system and  
134 community, as well as their involvement in the management of NTDs. The study conducted

135 in-depth Key Informant Interviews (KIIs) with community members such as the NTD focal  
136 persons. Additionally, the study conducted Focus Group Discussions (FGDs) with parents,  
137 teachers, town announcers, opinion leaders, enrolled school-aged children (ESAC), and non-  
138 enrolled school-aged children (NESAC). A semi-structured questionnaire was used as a tool  
139 during these sessions to guide the exploration of ideas. Thematic analysis was used to extract  
140 key themes and sub-themes from the data. This methodology enabled a comprehensive  
141 understanding of the challenges faced by NTD control programs in addressing STH and SCH  
142 and provided valuable insights into the barriers to achieving effective control interventions.

### 143 **Sample size determination**

144 As a qualitative study, the authors did not perform sample size calculation; instead, they  
145 predetermined the number of Focus Group Discussions (FGDs) and Key Informant Interviews  
146 (KIIs) necessary to achieve ideal saturation. The authors planned to conduct 12 FGDs and 15  
147 in-depth interviews to reach this goal.

### 148 **Data collection**

149 To ensure the reliability of the data collected, the semi-structured and FGDs interview topics  
150 were developed and pretested (See Supplementary Materials 1-3). Audio tape recorders were  
151 used to capture all the information obtained during the KIIs and FGDs. The interviewers also  
152 made observations and took notes while recording to ensure accuracy. The interviews were  
153 conducted in both English (the national language of Nigeria) and Yoruba (the local language  
154 of the study participants) in various settings, including small halls, private rooms, and offices.  
155 The duration of each KII ranged from 20 to 40 minutes. FGDs were conducted in the  
156 participants' respective LGAs.

### 157 **Data processing and analysis**

158 Data from FGDs and KIIs were transcribed, coded, and analyzed thematically based on the  
159 emerging themes of barriers, drugs, knowledge, and recommendations. The recorded audio in  
160 the Yoruba language was transcribed into the English language. The transcription was checked  
161 independently by the team members for verification and accuracy with simultaneous audio



162 playing. The study content was analyzed thematically, indexed, and coded inductively using  
163 the QRS Nvivo 12 software package (QRS International, Doncaster, Australia) for the content  
164 analysis of unstructured qualitative data. The initial open codes were sorted into sub-themes  
165 based on their similarity. These sub-themes were clustered and refined to form broad themes  
166 and debated within the research team. The nodes under drugs were categorized into three  
167 (acceptability, accessibility, and effectiveness) according to the participant's responses. The  
168 knowledge nodes were categorized into awareness, causes, drugs, MDA, prevalence, mode of  
169 transmission, symptoms, and treatments. Data collection, analysis, and reporting followed the  
170 Standards for Reporting Qualitative Research (SPQR) guidelines.

171 To ensure consistency during protocol preparation, data collection, development of a coding  
172 system, interrater reliability, and data analysis, Guba and Lincoln's criteria for determining  
173 rigor in qualitative research were used (13). Two interviews per group were coded by two  
174 authors (FT, DN), for which the degree of similarity was determined by calculating the  
175 interrater reliability using the QRS Nvivo 12 software package (QRS International, Doncaster,  
176 Australia). Cohen proposed that Kappa scores should be interpreted using the following: values  
177  $\leq 0$  indicate lack of agreement, values 0.01 – 0.20 indicate no or little agreement, values 0.21  
178 – 0.40 indicate fair agreement, values 0.41–0.60 indicate moderate agreement, values 0.61–  
179 0.80 indicate substantial agreement, and values 0.81 – 1.00 indicate nearly perfect agreement.  
180 Kappa's score for the thematic analysis was 1.00, indicating nearly perfect agreement.

### 181 **Data quality control**

182 To ensure the quality of data, the KIIs and FGDs questions were well discussed by the team  
183 members before actual data collection. An intensive three-day training was given for data  
184 collectors on how to conduct in-depth interviews and FGDs. Supervision was done throughout  
185 the data collection process by the investigators.

186

187 **Results**

188 The findings can be broadly split into four thematic areas, knowledge, barriers, drugs, and  
 189 recommendations as shown in Table 1. Key components of MDA-integrated control programs  
 190 such as the critical role of teachers, parents, health workers, and community members in  
 191 engaging for MDA in terms of mobilization and sensitization were described by the study  
 192 participants.

193 **Table 1 Themes and Sub-themes**

| <b>Themes</b>          | <b>Sub-themes</b>                                                                                                                                                                              |
|------------------------|------------------------------------------------------------------------------------------------------------------------------------------------------------------------------------------------|
| <b>Knowledge</b>       | 1. Perception of transmission<br>2. Perception of symptoms<br>3. Misconceptions about disease causation, transmission, and drug safety<br>4. Drug/Mass Drug Administration                     |
| <b>Drugs</b>           | 1. Acceptability<br>2. Accessibility<br>3. Effectiveness                                                                                                                                       |
| <b>Barriers</b>        | 1. Low knowledge and awareness of the diseases and control interventions<br>2. Inadequate community engagement and involvement<br>3. Weak health system and partner support                    |
| <b>Recommendations</b> | 1. Community sensitization and engagement<br>2. Improving drug distribution and effectiveness<br>3. Strengthening health system support<br>4. Enhancing partner collaboration and coordination |

194

195 **Demographic Characteristics of Participants**

196 A total of 144 community participants were involved in the study. A total of 12 FGDs were  
 197 conducted amongst the community groups who have enrolled SAC and Non-enrolled SAC;  
 198 teachers and parents; opinion leaders and town announcers. Table 2 below presents the  
 199 composition of the KII and FGD and Table 3 the socio-demographic characteristics of the study  
 200 participants in the KIIs and FGDs.

201 **Table 2 Composition of Key Informant Interview and Focused Group Discussion**

| <b>Participants</b>                            | <b>Female</b> | <b>Male</b> | <b>Total</b> |
|------------------------------------------------|---------------|-------------|--------------|
| Enrolled and non-enrolled school-aged children | 31            | 17          | 48           |
| Teachers/Parents                               | 31            | 17          | 48           |
| Community members                              | 26            | 22          | 48           |

202

204 **Table 3 Socio-demographic characteristics of the study participants in the KIIs and**

205 **FGDs**

| <b>Description</b>    | <b>Frequency<br/>(N = 144)</b> | <b>Percentage<br/>(%)</b> |
|-----------------------|--------------------------------|---------------------------|
| <b>Gender</b>         |                                |                           |
| Male                  | 56                             | 39.0%                     |
| Female                | 88                             | 61.0%                     |
| <b>Age in years</b>   |                                |                           |
| 6-9                   | 8                              | 5.60%                     |
| 10-14                 | 30                             | 20.8%                     |
| 15-19                 | 10                             | 6.90%                     |
| 20-24                 | 9                              | 6.30%                     |
| 25-29                 | 8                              | 5.60%                     |
| 30-34                 | 25                             | 17.40%                    |
| 35-39                 | 20                             | 13.9%                     |
| 40-44                 | 18                             | 12.5%                     |
| 45-49                 | 12                             | 8.30%                     |
| ≥ 50                  | 4                              | 2.80%                     |
| <b>Marital Status</b> |                                |                           |
| Single                | 62                             | 43.1%                     |
| Married               | 77                             | 53.5%                     |
| Divorced              | 5                              | 3.50%                     |
| <b>Religion</b>       |                                |                           |
|                       |                                | 0.0                       |
| Christianity          | 79                             | 54.9%                     |
| Islam                 | 60                             | 41.7%                     |
| Missing               | 5                              | 3.50%                     |
| <b>Occupation</b>     |                                |                           |
|                       |                                | 0.0                       |
| Enrolled SAC          | 24                             | 16.7%                     |
| Non-enrolled SAC      | 24                             | 16.7%                     |
| Parents               | 24                             | 16.7%                     |
| School teachers       | 24                             | 16.7%                     |
| Opinion leaders       | 24                             | 16.7%                     |
| Town announcers       | 24                             | 16.7%                     |

206

207 **Theme 1. Knowledge**

208 **Sub-theme 1.1. Perception of transmission**

209 Parents, teachers, ESAC, and NESAC were assessed on their knowledge of STH and SCH as  
 210 well as the mode of transmission. Most of the parents, teachers, opinion leaders, and town  
 211 announcers showed an acceptable knowledge of these diseases, and the mode of transmission  
 212 was well highlighted by the teachers. The knowledge of STH and SCH and the mode of  
 213 transmission was observed to be poor among the ESAC and NESAC.

214 A NESAC participant stated that schistosomiasis:

215 *“It’s a disease that worries the stomach if one hasn’t eaten.”*

216 Another NESAC opined that,

217 *“It’s something that worries the stomach if the drug isn’t being used properly”*

218 The most common response to the cause of STH infection was,

219 *“do not pee in the river to prevent”*

220 Another NESAC said that,

221 *“Not good to pee around, especially where the dog has peed. It will lead to bloody*  
222 *urine.”*

223 While another said the source of schistosomiasis infection was:

224 *“contacted through water if an infected person has previously peed inside a river*  
225 *another human can contact it”*

226 An ESAC said that,

227 *“worm causes malaria. It’s a bad disease that happens in Nigeria”*

228 Another ESAC said that,

229 *“What I know about worm disease is that it does not allow our body to react the way*  
230 *it should. It also caused vomiting and dry body”*

231 When asked about the mode of transmission of these infections, an ESAC said that,

232 *“urinating in the river to prevent it we should not be urinating in the river again.”*

233 Another ESAC said that

234 *“It is bad for someone to be urinating everywhere because wherever a dog urinates*  
235 *and a person goes to urinate there such an individual can be infected by passing out bloody*  
236 *urine.”*

237 It can be said that most of the N/ESAC participants opined that the disease is caused by contact  
238 with dog urine.

239 *“by urinating on the same spot, a dog urinates”*

240 *“By urinating in the same spot, a dog urinates and bathing inside an infected river”*

241 While a few others attributed it to the consumption of sugary things

242 *“if one eats many sugary things and eats dirty things”*

243 *“Eating sugary things in the morning”*

## 244 **Subtheme 1.2. Perception of symptoms**

245 The majority of the community members interviewed had adequate knowledge of the  
246 symptoms of schistosomiasis and soil-transmitted helminths. An ESAC gave an account of her  
247 personal experience when she had the disease,

248 *“...when I had worm disease, I had stomach pain and was vomiting; a worm also  
249 came out from my anus”*

250 A teacher elaborated on the symptoms of the disease.

251 *“...according to what they said, it doesn't normally show on the face but you can see  
252 it when the person urinates with a touch of blood. Also, a fat person infected will be getting  
253 lean. The children at times maybe he agile in class, but he will not feel agile anymore he will  
254 be dizzy, reluctant, will not feel happy the behavior will change generally.”*

255 Another teacher stated that the disease influences the student's academic performance, she  
256 mentioned that the students infected with the disease show sign of low assimilation.

257 *“...children were vomiting the worms out, stunted growth, poor assimilation, blood in  
258 the urine, loss of urine”*

259 A NESAC stated that

260 *“... yes, there is, a particular drug given to us by the government which is being used  
261 every 3 months”*

## 262 **Subtheme 1.3. Misconceptions about disease causation, transmission, and drug safety**

263 A parent had a major misconception about the diseases and their symptoms

264 *“I have seen two. He first is my child. He always complained of stomach upset after  
265 eating and he seemed to always want to throw up. The second is my neighbor's child who  
266 always screamed while taking a pee”*

267 When asked about the symptoms exhibited by children who have contracted the diseases,  
268 ESACs had a popular idea in their mind that it causes stomach aches.

269 *“When I am sick with worm, I have a stomach ache and feel vomiting”*

270 *“One goes to defecate all the time when infected with a worm.”*

271 *“When infected with the worm, you urinate and vomit most times and sleep a lot.”*

272 *“It causes the stomach to be a big, thin body and big head.”*

273 Parents had a better opinion of the symptoms exhibited by children who contracted the diseases

274 however some wrong ideas given include:

275 *“blood in the urine”*

276 *“severe stomach ache (sugary things)”*

277 *“Discharge during urination”*

278 *“blood in urine, do not pee in the river to prevent”*

279 Some first-hand experience by some non-enrolled children on the symptoms that they

280 experience.

281 *“What I know about worm disease is that it does not allow our body to react the way*

282 *it should. It also caused vomiting and a dry body.*

283 *“vomiting, being irritated, various tummy complaints, Stony saliva in the mouth”*

284 *“Stony saliva in the mouth, nausea, vomiting, running stomach, weight loss”*

285 *“When I had worm disease, I had stomach pain and was vomiting; a worm also came*

286 *out from my anus. My dad took me to the hospital.”*

#### 287 **Theme 1.4. Mass Drug Administration**

288 The MDA program was well accepted by the community. One respondent said:

289 *“...Socialization meetings are being held every month, there’s good cooperation*

290 *between us about the MDA.”*

291 An opinion leader also confirmed that the community members cooperate with them to make

292 the MDA program effective. He stated that:

293 *“...no direct communication, but there are representatives we get through. But there’s*

294 *effective cooperation”*

295 Another respondent stated that:

296 *“Through the records, it’s of high acceptability, and there has been positive support*  
297 *from people in the community.”*

298 A teacher who was involved in the program shared her experience which shows that there had  
299 been improvement in the MDA programs.

300 *“...Eh! Well... it is effective, the reason I said that is that last year they give me the*  
301 *drug about 400 and something, but it is only 100 they used because they reject it but this time*  
302 *to God be the glory, I worked hard, talked to the parents on the benefits so now it is*  
303 *effective.”*

304 The reasons mentioned for poor mass drug administration first was that people heard that the  
305 drug killed a student who took the drug. An ESAC stated that,

306 *“... a primary 4 pupil brought noodles. She slept after taking the drugs till closing*  
307 *time, and the next day we were told she died”*

308 When an opinion leader was asked about the incident during the FGD sessions, he said that it  
309 was a rumor which was later debunked.

310 *“...though there were rumors and rejection, people were later educated on the drugs,*  
311 *and it’s always administered in the morning not far from breakfast.”*

312 Another respondent, a parent also confirmed it and emphasized that the drug was given to them  
313 at no cost.

314 *“...government gives drugs which are not being sold just for worm alone and for*  
315 *schistosomiasis”*

316 Regarding the knowledge of the drug given to them, the majority of the ESAC and NESAC  
317 spoke about the color of the drug but only a few of them were able to mention the drug’s name.

318 Although, the teachers and some parents were able to provide the names of the drugs.

319 A NESAC student stated that,

320 *“The administrators ask about our ages and they measure our heights which then*  
321 *corresponds to the type of drug we will be given. Generally, these tablets are of different*  
322 *shapes: one is a little bit longer while the other is round in shape”.*

323 An ESAC stated that,

324 *“...it’s white in color and long and the name of the drug is Albendazole”*

325 Furthermore, the ESAC and NESAC cited that before they can take the drug they are supposed  
326 to seek their parent’s consent. An ESAC said that,

327 *“...our teachers instructed us to bring solid food to school. Mother was aware. Took*  
328 *‘Eba’ to school. One minute after food, we were measured and drugs were given according*  
329 *to age and height. It was not easy to swallow.”*

330 Although few of the parents insisted that their child should not be given the drugs due to the  
331 side effects, a parent said:

332 *“...there are some side effects but it’s being effective and successful, it’s a very*  
333 *powerful drug and if one didn’t eat a solid food it may cause dizziness or faint”*

334 According to an opinion leader, there are different drugs given for STH and SCH. He  
335 mentioned some of the drugs given.

336 *“... Mectizan for eye worms, Albendazole for worms, mebendazole for*  
337 *schistosomiasis. When the disease is cleared people will be free to do what they want to do”*

338 Another opinion leader said,

339 *“...before drugs, they should ensure they eat well because the drug is strong”*

340 Contrary to the treatment provided by the government, the respondents also mentioned the  
341 alternative treatment available in the community. A parent said,

342 *“... people get treated, through herbal treatment (Yoruba herbs) and clinic care”*

343 Another parent explained further the alternative treatment provided by their traditional healers.  
344 She believed that although the treatment works there is a problem related to the usage of herbs  
345 as its dosage cannot be measured compared with clinical prescription. This view is depicted in  
346 a quote by a parent.

347 *“The herbs, we have our traditional healers that they are using herbs for it.*

348 *They cook and drink it without measurement and as they are drinking it, it will just come out*  
349 *through urine or feces.”*



350 Another parent also felt that,

351 *“...although I always use the modern method because we have been advised to do so.*  
352 *Locally made drugs do not have dosage and that might even cause more harm to our children*  
353 *than good. I, therefore, believe that modern medication is the right medication for these*  
354 *diseases”.*

355 An opinion leader said,

356 *“...I do not go for herbal concoction. In the hospital, there's no significant cost,*  
357 *just card fees”*

358

## 359 **Theme 2: Drugs**

### 360 **Sub-theme 2.1. Drugs acceptability**

361 Beliefs and perceptions about the drugs and their side effects were found to be critical in  
362 shaping acceptance. When asked about their opinion on drug acceptance in their community.  
363 The participants gave the following reasons.

364 *“So the worm won't worry them again, we will accept”*

365 *“not to get infected with it again or come in contact again”*

366 A participant mentioned that he accepted it because a friend accepted it, and there were no side  
367 effects.

368 *“.....because she has used it before and didn't worry her”*

369 However, some NESAC said they would not accept the drug stating some reasons which were  
370 mostly related to the side effects of the drugs. Some of the side effects highlighted were:

371 *“fear of vomiting, bitter taste, and laziness”*

372 *“Some people think the drug might make them vomit or stool”*

373 *“Some set of people that received these medications complained of headache”*

374 *“Some people who are already on medications refused to take these drugs and also,*  
375 *some felt taking the drugs will make them weak”*

376 From the responses of the NESAC, it was observed that most of them were skeptical about the  
377 drug and its side effects. Also, the ESAC shared similar sentiments on the side effects of the  
378 drug. For instance, a participant reported an adverse effect a brother had after using the drug.

379 *“because it made my brother faint which made him come back home the next day, and*  
380 *she was warned by her people not to use it again”*

381 Acceptability was influenced by the decision of the mother. The following quotes from the  
382 N/ESAC demonstrate this,

383 *“Last year she took it and fell ill, so her mother said No”*

384 *“Because their mum asked them not to use it, that it will make them fall sick”*

385 FGDs among the ESAC and NESAC revealed rumors and parents’ opinions have a strong  
386 effect on drug acceptability.

387 Among some parents and teachers, it was observed that the drug has high acceptability as a  
388 parent stated:

389 *“.....everyone in our community is using it. Even my kids”*

390 Another parent said

391 *“yes everyone in my community is using it”*

392 And similarly, the opinion leaders thought that the drug is of high acceptability in their various  
393 communities as they all opined that

394 *“Through the records, it’s of high acceptability, and there has been positive support*  
395 *from people in the community.”*

### 396 **Sub-theme 2.2. Drug accessibility**

397 The drugs are available and only administered by the health officers who summon parents to a  
398 meeting before administering them in the school. A teacher expressed,

399 *“.....Yes, I believe they are health officers. They usually call for parents meeting*  
400 *before school distribution.”*

401 Another teacher said,

402 “.....right now the drug is available because we have been giving it to the children in  
403 school according to their age and height.”

### 404 **Sub-theme 2.3. Drug effectiveness**

405 The opinion leaders gave their perceptions on the accessibility and effectiveness of the drugs  
406 administered, despite the identified barriers, they could attest to the efforts of the government  
407 as being effective to a level. An opinion leader expressed,

408 “Yes they are given and it’s being done through the house-to-house administration  
409 and also through mobilization to health centers”

410 Another one stated with emphasis the personal effort embarked on to ensure that the drugs were  
411 effectively distributed in their location.

412 Similarly, another opinion leader reiterated this effort saying,

413 “Yes, we distribute ourselves into groups to increase coverage. Some go in the  
414 morning, some do afternoon in rounds.”

415 However, the effectiveness of the drug was attested to by most of the opinion leaders. They  
416 mentioned the effectiveness of the drug as the reason why the drug is still being accepted for  
417 usage by some parents.

418 “There is a big effectiveness of the drug cause if there aren’t people won’t collect the  
419 drugs to use”

420 “Yes, it is very effective, though it made some kids dizzy it’s very effective.”

421 A parent acknowledged there were side effects though the drug is effective,

422 “though there are some side effects it’s effective and successful, it’s a very powerful  
423 drug and if one didn’t eat solid food it may cause dizziness or fainting. And in case of that,  
424 they are told to use glucose”

425

426

427

428

429 **Theme 3: Barrier**

430 **Theme 3.1. Low knowledge and awareness of the diseases and control interventions**

431 Perceived barriers were assessed among the study participants to the acceptability of the drugs.

432 Responses from the ESAC and NESAC were consistent. ESAC noted that,

433 *“...people decline because of parents' instructions because their mum asked them*

434 *not to use it that it could make them sick.”*

435 *“.... the fear of vomiting and laziness, some children throw the drug away*

436 *because it is bitter”*

437 *“...the smell of the drug, it is not nice”*

438 A NESAC opined that,

439 *“.... some parents warned their children not to receive these medications,*

440 *saying the medications are bad”*

441 *“..... the smell of drugs is not nice, I fear vomiting, bitter taste, and laziness”*

442 In the FGDs among the parents, it was mentioned that,

443 *“...the parents are ignorant; they don't know what the drug is about.”*

444 Others stated the side effects of the drugs as barriers to the acceptability of the drug.

445 Interestingly, a parent emphasized an important factor that affects the acceptability of the drug

446 to her and some others.

447 *“Appearance shows the manner. Sometimes the medical staff appears moody and all*

448 *sorts to the parents and people. This will discourage the masses*

449 *from accepting what is being brought to them”*

450 **Theme 3.2. Inadequate community engagement and involvement**

451 The perspective of opinion leaders and town announcers were sought after being the gatekeeper

452 of the communities. They gave several reasons that could serve as a hindrance to the

453 acceptability of the drug which would help assist the providers to strategize in the distribution

454 of the drug.

455 Transportation of the drug was highlighted as one of the barriers experienced. Another potential  
456 barrier identified was the late announcement/sensitization of the MDA roll-out.

457 *“.... Time allowed for campaign and education is not enough.”*

458 Another participant noted that incentives given to drug administrators are important:

459 *“The small incentive is discouraging. When there was no payment, we didn't go*  
460 *around, but the turnout was poor. People said we didn't give them food to take medicine. But*  
461 *now we do house-to-house. The money is small no doubt, but if it is paid on time it will be*  
462 *encouraging.”*

463 A participant noted that rumors about the drug were a deterrent to the acceptability of the drug  
464 stating that:

465 *“These things give a draw-back to this program because some of these rumors are not*  
466 *true and didn't happen”*

### 467 **Theme 3.3. Weak health system and partner support**

468 Some opinion leaders opined that the drug administered from a private health facility will give  
469 it more credibility. Also, it was the purchasing power of the parents when they want to buy  
470 outside of the period of MDA by the state government. Someone mentioned that some religious  
471 leaders preach against the usage of drugs. This is a vital issue to be explored by the MDA  
472 providers.

473

### 474 **Theme 4.**

#### 475 **Themes 4.1. Community sensitization and engagement**

476 Several recommendations were given to improve the MDA program. NESAC mentioned the  
477 importance of financial incentives to people for using the drug.

478 *“Bribing people will ensure the usage.”*

479 *“give kids incentives”*

480 *“Distribution should be followed by incentives, which can be distributed through*  
481 *schools as kids fear the teachers.”*

482 Similarly, ESAC also suggested giving incentives.

483 *“Sweets and candies should be shared with the children while distributing the drugs*  
484 *to the children, they should be cajoled into taking it by promising the nice things e.g. biscuits,*  
485 *sweets and telling them the drug is sweet”*

486 *“By buying things for the children; biscuits sweets... even the reluctant children will*  
487 *accept the drug afterward”*

488 Some others opined that,

489 *“Awareness through radio programs and media for people to know the efficiency and*  
490 *effectiveness of the drug”*

491 *“by educating them about the drug for them to know about the effectiveness”*

#### 492 **Themes 4.2. Improving drug distribution and effectiveness**

493 Interestingly, another NESAC suggested that the drug be made more palatable to use in  
494 combination with effectiveness and parents influencing their kids to use.

495 *“.... if the drug is sweet if it works well in the body if parents insist they use it.”*

496 Some recommended educating parents and even the kids on the benefit of taking the drug.

497 *“Inform the child and parents about the effectiveness of the drug”*

498 *“When you educate and sensitize them and also give them gifts”*

499 Parents' and teachers' recommendations were captured under the major theme of sensitization.

500 Parents encouraged the government to increase the sensitization of the public on the drug and  
501 the program.

502 *“Government should continue to do more awareness to people”*

503 *“Awareness creation and educating them more, on media about the drug”*

504 *“Continue doing the publicity because most parents are ignorant that is the*  
505 *problem.”*

#### 506 **Themes 4.3. Strengthening health system support**

507 Some proactive measures were recommended by some parents:

508 *“Appearance shows the manner. Sometimes the medical staff appears moody and all*  
509 *sorts to the parents and people. This will discourage the masses from accepting what is being*  
510 *brought to them”*

511 *“The medical staff should try to show love and joy while passing information across*  
512 *and try to explain the benefits very well so people can understand”*

513 Other parents recommended food during the drug distribution.

514 *“Availability of food for them to use the drug”*

515 *“...If they can extend the time and continuity of the drug and ensure availability of*  
516 *food during the drug administration”*

517 *“To ensure there’s the availability of food because the drug is strong”*

518 Opinion leaders gave similar recommendations in the same vein that awareness should be done  
519 so rigorously.

520 *“megaphone should be given to creating awareness”*

521 *“Proper awareness through media to encourage people.”*

522 *“Education of the drug to people”*

523 *“They should make awareness and the drug should be made available and brought to*  
524 *every one school and house”*

525 Some opinion leaders opined that the welfare of the frontline workers is taken more seriously.

526 *“The health care workers should be compensated and paid well for easy work and*  
527 *effective awareness”*

528 *“it’s to ensure the health workers are paid and proper awareness should be made.”*

529 *“I will advise they pay health workers and take all things reported with all*  
530 *seriousness”*

531 *“mobilizers need money, transportation too. Everything needs to be funded, even the*  
532 *megaphones we use need a battery, so you can see money is key”*

533 *“Government shouldn’t relent and ensure funds are paid and do more of awareness*  
534 *creation”*

535 Some opinion leaders even recommended that MDA administrators take the drug in the  
536 presence of the student to encourage them to use it.

537 *“The drug administrators should use the medicines first”*

538 Another opinion leader recommended that there should be a repeat of the exercise for students  
539 who missed the day of administration.

540 *“Mectizan should be twice a year because some are upset when they miss the drug  
541 distribution due to travel”*

542 *“The interval is too long, adequate education is required before administration”*

543



544 **Discussion**

545 Mass Drug Administration for vulnerable populations has been the best approach for the  
546 prevention of STH and SCH globally (14, 15). Our findings from key stakeholders and school-  
547 aged children highlighted four main areas: knowledge, drug acceptability, accessibility,  
548 barriers, and recommendations. The participants were drawn from different interest groups  
549 whose socio-demographic characteristics demonstrated the appropriateness of each category.  
550 It was important to find out if the children, the recipients of the drugs were aware of the  
551 knowledge of the drugs and the process of MDA. It was difficult for the ESAC and NESAC to  
552 differentiate between STH and SCH infection and their mode of transmission. The inadequacy  
553 of knowledge among the SAC has been substantiated by evidence from several studies in  
554 Africa for instance studies done in Malawi, Kenya, Uganda, and Tanzania (16-20). Poor  
555 environmental and sanitary conditions are linked to SCH infections (21) while STH is  
556 transmitted through contaminated soil (22, 23). Our findings revealed that most participants  
557 associated these diseases with drinking dirty contaminated water (17). There were several  
558 misconceptions like transmission through urinating where dogs have urinated and bathed inside  
559 infected rivers. These findings agree with an Ethiopian study on low awareness and common  
560 misconceptions about schistosomiasis (24). Limited knowledge has been highlighted as a factor  
561 promoting the transmission of STH and SCH infection (25).

562 The majority of the participants demonstrated adequate knowledge of the symptoms of STH  
563 and SCH infection. They pointed out bloody stools and urine, vomiting, fever, headaches,  
564 abdominal aches, and generalized body aches.

565 It can be assumed that with a good knowledge of the drugs and the potential benefits, the  
566 acceptance would be better and the attitude towards it would improve. In regards to the  
567 treatment of SCH and STH, the majority of the respondents were aware of the importance of  
568 the treatment and they affirm that the government provides drugs for them. The provision of  
569 drugs by the government is an advantage to these communities as there is literature contrasting  
570 this with reports of drug shortages as challenges being encountered (26, 27). The children only

571 recalled the color of the drugs in contrast to the adult respondents who were able to state that  
572 there were different drugs given for STH and SCH.

573 Both STH and SCH were acknowledged as a burden among the community members especially  
574 due to the knowledge deficit. This is echoed in several studies on the knowledge, attitudes, and  
575 practices of SCH and STH (17, 18, 26, 28-30).

576 It was evident that people were involved in health programs in one way or another. The study  
577 revealed that the people in the community understand the implication of schistosomiasis and  
578 soil-transmitted diseases which makes them cooperate more and make the MDA program  
579 effective thus underscoring the impact of MDA in the control of SCH and STH (23, 31).

580 The acceptability of the administered drug during the MDA program was assessed among the  
581 ESAC and NESAC by asking if the children would accept the drugs or not. It was noted that  
582 the majority of the NESAC accepted the drugs because of the benefit of the drug. Some others  
583 did not accept the drug based on the color, bitterness, or bad taste and others mentioned side  
584 effects like headaches. These findings are in line with Kimani et.al. on the acceptability of  
585 praziquantel in the treatment of *Schistosoma haematobium* in preschool children (32). The  
586 family has a great influence on the acceptability of MDA(33), our findings revealed that the  
587 decision to accept the MDA was based on the influence of the mothers. On the accessibility,  
588 the children could not tell categorically how it could be accessed, however, the parents and the  
589 teachers expressed that the drugs were accessible in their various communities and were only  
590 administered by the health officers who summoned the parents to a meeting in school before  
591 the MDA exercise.

592 The parents and teachers voiced that fears about the drugs and acceptability of the drug are a  
593 hindrance to the acceptance and uptake of the MDA program among them even as stakeholders  
594 to the children. The majority of parents and teachers noted that there is a need for further  
595 enlightenment on the program and the effects of the drug especially. Further, our findings  
596 revealed drug side effects, parental instructions against usage, and unpalatable drug  
597 characteristics as barriers. Similar barriers have been identified in other studies(26, 31, 34).

598 Some recommendations were fronted by the study participants; categorized as improving the  
599 welfare package of the frontline health workers on the program, revisiting of distribution  
600 strategy, increasing awareness levels, and giving incentives to children. To increase  
601 effectiveness, there is a need for clear, concise, and consistent sensitization to the communities  
602 (17, 28, 31).

603 In this community perspective study, we found that participants generally had correct  
604 perceptions of STH and SCH transmission. However, some misperceptions persisted regarding  
605 disease causation and transmission, as well as fear and distrust surrounding the deworming  
606 drugs used in mass drug administration (MDA). Specifically, participants were concerned  
607 about how to handle side effects and adverse effects, the capabilities of MDA providers to  
608 address them, and perceived inferiority to commercially available anthelmintic drugs. Despite  
609 these challenges, participants acknowledged a knowledge gap and expressed a desire for better  
610 sensitization campaigns, information dissemination, and assurances of their safety. To address  
611 these issues, we recommend strengthening health education messages and increasing the  
612 visibility or availability of on-site medical personnel. By understanding how parents and  
613 children perceive MDA activities, policymakers and program implementors can work to  
614 eliminate barriers to compliance and achieve the target coverage rate for administering chemo-  
615 preventive drugs for intestinal parasites. Overall, our findings have important implications for  
616 improving MDA programs and increasing their effectiveness in reducing the burden of  
617 intestinal parasitic infections in this community.

618 The study had some limitations. Firstly, it was conducted in communities in Ogun State,  
619 Nigeria and therefore the findings may not be generalizable to other populations or  
620 communities with different socioeconomic or cultural backgrounds. Secondly, participants  
621 may have provided socially desirable responses, leading to potential social desirability bias.  
622 Thirdly, the study relied on self-reported data which may have been subject to recall bias or  
623 misreporting. Fourthly, the study only collected cross-sectional data at a single point in time,  
624 and longitudinal data would have allowed for a better understanding of changes in community

625 perceptions and behaviors over time. Lastly, language barriers may have affected the quality  
626 and accuracy of the data collected, as the study was conducted in a language that may not have  
627 been familiar or comfortable for all participants.

628 **Acknowledgment**

629 This publication was supported by a grant from the African Research Network for Neglected  
630 Tropical Diseases (ARNTD) through United States Agency for International Development  
631 (USAID), UK aid from the British people, and the Coalition for Operational Research on  
632 Neglected Tropical Diseases (COR-NTD). Its content is solely the responsibility of the authors  
633 and does not necessarily represent the views of ARNTD, COR-NTD, UK aid, or USAID.

634

635

## 636 **References**

- 637 1. Oluwole A, Dean L, Lar L, Salami K, Okoko O, Isiyaku S, et al. Optimising the performance  
638 of frontline implementers engaged in the NTD programme in Nigeria: lessons for strengthening  
639 community health systems for universal health coverage. 2019;17(1):1-16.
- 640 2. Adekeye O, Ozano K, Dixon R, Elhassan EO, Lar L, Schmidt E, et al. Mass administration of  
641 medicines in changing contexts: Acceptability, adaptability and community directed approaches in  
642 Kaduna and Ogun States, Nigeria. J PLOS Neglected Tropical Diseases. 2020;14(11):e0008857.
- 643 3. Akinsolu FT, Nemieboka PO, Njuguna DW, Ahadji MN, Dezso D, Varga O. Emerging  
644 resistance of neglected tropical diseases: a scoping review of the literature. J International Journal of  
645 Environmental Research  
646 Public Health. 2019;16(11):1925.
- 647 4. World Health Organisation WHO. Combatting neglected tropical diseases in Africa 2022  
648 [cited 2023 26/02/2023]. Available from: [https://whotogo-  
649 whoafroccmaster.newsweaver.com/jku37xzkcl/dxuo9ees7uk6ct8pa3ilzy?email=true&lang=en&a=2&  
650 p=61184112&t=32479143](https://whotogo-whoafroccmaster.newsweaver.com/jku37xzkcl/dxuo9ees7uk6ct8pa3ilzy?email=true&lang=en&a=2&p=61184112&t=32479143).
- 651 5. Hotez PJ, Kamath AJPntd. Neglected tropical diseases in sub-Saharan Africa: review of their  
652 prevalence, distribution, and disease burden. 2009;3(8):e412.
- 653 6. Dizon J, Grimmer K, Louw Q, Kredo T, Young T, Machingaidze SJSAMJ. South African  
654 Guidelines Excellence (SAGE): adopt, adapt, or contextualise? 2016;106(12):1177-8.
- 655 7. Souza AA, Ducker C, Argaw D, King JD, Solomon AW, Biamonte MA, et al. Diagnostics  
656 and the neglected tropical diseases roadmap: setting the agenda for 2030. 2021;115(2):129-35.
- 657 8. Casulli A. New global targets for NTDs in the WHO roadmap 2021–2030. J PLOS Neglected  
658 Tropical Diseases: Public Library of Science San Francisco, CA USA; 2021. p. e0009373.
- 659 9. Means AR, Jacobson J, Mosher AW, Walson JLJPntd. Integrated healthcare delivery: a  
660 qualitative research approach to identifying and harmonizing perspectives of integrated neglected  
661 tropical disease programs. 2016;10(10):e0005085.
- 662 10. Bockarie MJ, Kelly-Hope LA, Rebollo M, Molyneux DH. Preventive chemotherapy as a  
663 strategy for elimination of neglected tropical parasitic diseases: endgame challenges. J Philosophical  
664 Transactions of the Royal Society B: Biological Sciences. 2013;368(1623):20120144.

- 665 11. Oyeyemi OT, de Jesus Jeremias W, Grenfell RFQ. Schistosomiasis in Nigeria: Gleaning from  
666 the past to improve current efforts towards control. *J One Health*. 2020;11:100183.
- 667 12. Vindrola-Padros C, Vindrola-Padros B. Quick and dirty? A systematic review of the use of  
668 rapid ethnographies in healthcare organisation and delivery. *J BMJ Quality Safety*. 2018;27(4):321-  
669 30.
- 670 13. Lincoln YS, Guba EG. But is it rigorous? Trustworthiness and authenticity in naturalistic  
671 evaluation. *J New directions for program evaluation*. 1986;1986(30):73-84.
- 672 14. Gomes ECdS, Silva IEPd, Nascimento WRCd, Loyo RM, Domingues ALC, Barbosa CS.  
673 Urban schistosomiasis: An ecological study describing a new challenge to the control of this  
674 neglected tropical disease. *The Lancet Regional Health - Americas*. 2022;8:100144.
- 675 15. de Souza Gomes EC, da Silva IEP, do Nascimento WRC, Loyo RM, Domingues ALC,  
676 Barbosa CS. Urban schistosomiasis: an ecological study describing a new challenge to the control of  
677 this neglected tropical disease. *J The Lancet Regional Health-Americas*. 2022;8:100144.
- 678 16. Moyo VB, Changadeya W, Chiotha S, Sikawa D. Urinary schistosomiasis among preschool  
679 children in Malengachanzi, Nkhotakota District, Malawi: Prevalence and risk factors. *Malawi Med J*.  
680 2016;28(1):10-4.
- 681 17. Musuva RM, Awiti A, Omedo M, Ogutu M, Secor WE, Montgomery SP, et al. Community  
682 knowledge, attitudes and practices on schistosomiasis in western Kenya--the SCORE Project. *Am J*  
683 *Trop Med Hyg*. 2014;90(4):646-52.
- 684 18. Muhumuza S, Olsen A, Nuwaha F, Katahoire A. Understanding low uptake of mass treatment  
685 for intestinal schistosomiasis among school children: a qualitative study in Jinja district, Uganda. *J*  
686 *Biosoc Sci*. 2015;47(4):505-20.
- 687 19. Person B, Ali SM, A'Kadir FM, Ali JN, Mohammed UA, Mohammed KA, et al. Community  
688 Knowledge, Perceptions, and Practices Associated with Urogenital Schistosomiasis among School-  
689 Aged Children in Zanzibar, United Republic of Tanzania. *PLoS Negl Trop Dis*. 2016;10(7):e0004814.
- 690 20. Ochola EA, Karanja DMS, Elliott SJ. The impact of Neglected Tropical Diseases (NTDs) on  
691 health and wellbeing in sub-Saharan Africa (SSA): A case study of Kenya. *PLOS Neglected Tropical*  
692 *Diseases*. 2021;15(2):e0009131.

- 693 21. Klohe K, Koudou BG, Fenwick A, Fleming F, Garba A, Gouvras A, et al. A systematic  
694 literature review of schistosomiasis in urban and peri-urban settings. *PLOS Neglected Tropical*  
695 *Diseases*. 2021;15(2):e0008995.
- 696 22. Alemu Y, Degefa T, Bajiro M, Teshome G. Prevalence and intensity of soil-transmitted  
697 helminths infection among individuals in model and non-model households, South West Ethiopia: A  
698 comparative cross-sectional community based study. *PLOS ONE*. 2022;17(10):e0276137.
- 699 23. Mascarini-Serra L. Prevention of Soil-transmitted Helminth Infection. *J Glob Infect Dis*.  
700 2011;3(2):175-82.
- 701 24. Assefa A, Erko B, Gundersen SG, Medhin G, Berhe N. Low awareness and common  
702 misconceptions about schistosomiasis in endemic lowland areas in Western Ethiopia: a mixed-  
703 methods study. *BMC Public Health*. 2021;21(1):1064.
- 704 25. Barrow A, Badjie M, Touray J, Kinteh B, Nget M, Touray E, et al. Knowledge, Attitude, and  
705 Practice of Provincial Dwellers on Prevention and Control of Schistosomiasis: Evidence from a  
706 Community-Based Cross-Sectional Study in the Gambia. *J Trop Med*. 2020;2020:2653096.
- 707 26. Tuhebwe D, Bagonza J, Kiracho EE, Yeka A, Elliott AM, Nuwaha F. Uptake of Mass Drug  
708 Administration Programme for Schistosomiasis Control in Koome Islands, Central Uganda. *PLOS*  
709 *ONE*. 2015;10(4):e0123673.
- 710 27. Adriko M, Faust CL, Carruthers LV, Moses A, Tukahebwa EM, Lamberton PHL. Low  
711 Praziquantel Treatment Coverage for *Schistosoma mansoni* in Mayuge District, Uganda, Due to the  
712 Absence of Treatment Opportunities, Rather Than Systematic Non-Compliance. *Tropical Medicine*  
713 *and Infectious Disease*. 2018;3(4):111.
- 714 28. Sacolo H, Chimbari M, Kalinda C. Knowledge, attitudes and practices on Schistosomiasis in  
715 sub-Saharan Africa: a systematic review. *BMC Infectious Diseases*. 2018;18(1):46.
- 716 29. Deribe K, Meribo K, Gebre T, Hailu A, Ali A, Aseffa A, et al. The burden of neglected  
717 tropical diseases in Ethiopia, and opportunities for integrated control and elimination. *Parasit Vectors*.  
718 2012;5:240.
- 719 30. Yeshanew S, Bekana T, Truneh Z, Tadege M, Abich E, Dessie H. Soil-transmitted  
720 helminthiasis and undernutrition among schoolchildren in Mettu town, Southwest Ethiopia. *Scientific*  
721 *Reports*. 2022;12(1):3614.



- 722 31. Ssali A, Pickering L, Nalwadda E, Mujumbusi L, Seeley J, Lambert PHL. Schistosomiasis  
723 messaging in endemic communities: Lessons and implications for interventions from rural Uganda, a  
724 rapid ethnographic assessment study. *PLoS Negl Trop Dis.* 2021;15(10):e0009893.
- 725 32. Kimani BW, Mbugua AK, Kihara JH, Ng'ang'a M, Njomo DW. Safety, efficacy and  
726 acceptability of praziquantel in the treatment of *Schistosoma haematobium* in pre-school children of  
727 Kwale County, Kenya. *PLOS Neglected Tropical Diseases.* 2018;12(10):e0006852.
- 728 33. Mitchell E, Kelly-Hanku A, Krentel A, Romani L, Robinson LJ, Vaz Nery S, et al.  
729 Community perceptions and acceptability of mass drug administration for the control of neglected  
730 tropical diseases in Asia-Pacific countries: A systematic scoping review of qualitative research. *PLoS*  
731 *Negl Trop Dis.* 2022;16(3):e0010215.
- 732 34. Verjee MA. Schistosomiasis: Still a Cause of Significant Morbidity and Mortality. *Res Rep*  
733 *Trop Med.* 2019;10:153-63.
- 734
- 735

736 **Supporting information**

737 **S1 File. Key Informant Interview Guide**

738 **S2 File. Focus Group Discussion Guide for Parents, Teachers, Opinion leaders, and**

739 **Town announcers.**

740 **S3 File. Focus Group Discussion Interview Guide for School-aged Children.**
